# Supplementary material for: Compositae‐ParaLoss‐1272: A complementary sunflower‐specific probe set reduces paralogs in phylogenomic analyses of complex systems
Source: PubMed Central journal article supplement — Appl Plant Sci. 2024 Jan 27;12(1):e11568. doi: 10.1002/aps3.11568 (PMC10873820; doi:10.1002/aps3.11568), 2024-01-27

**APPENDIX S6.** Tanglegrams comparing the relationships between a pruned-down version of the Moore-Pollard and Mandel (2023a) tree now containing the 19 taxa used in this study, compared to the Compositae-1061 (A) and Compositae-ParaLoss-1272 (B) trees generated in this study. Lines between the taxa at the tips compare relationships: solid lines indicate the same relationship; dashed lines indicate differing relationships.

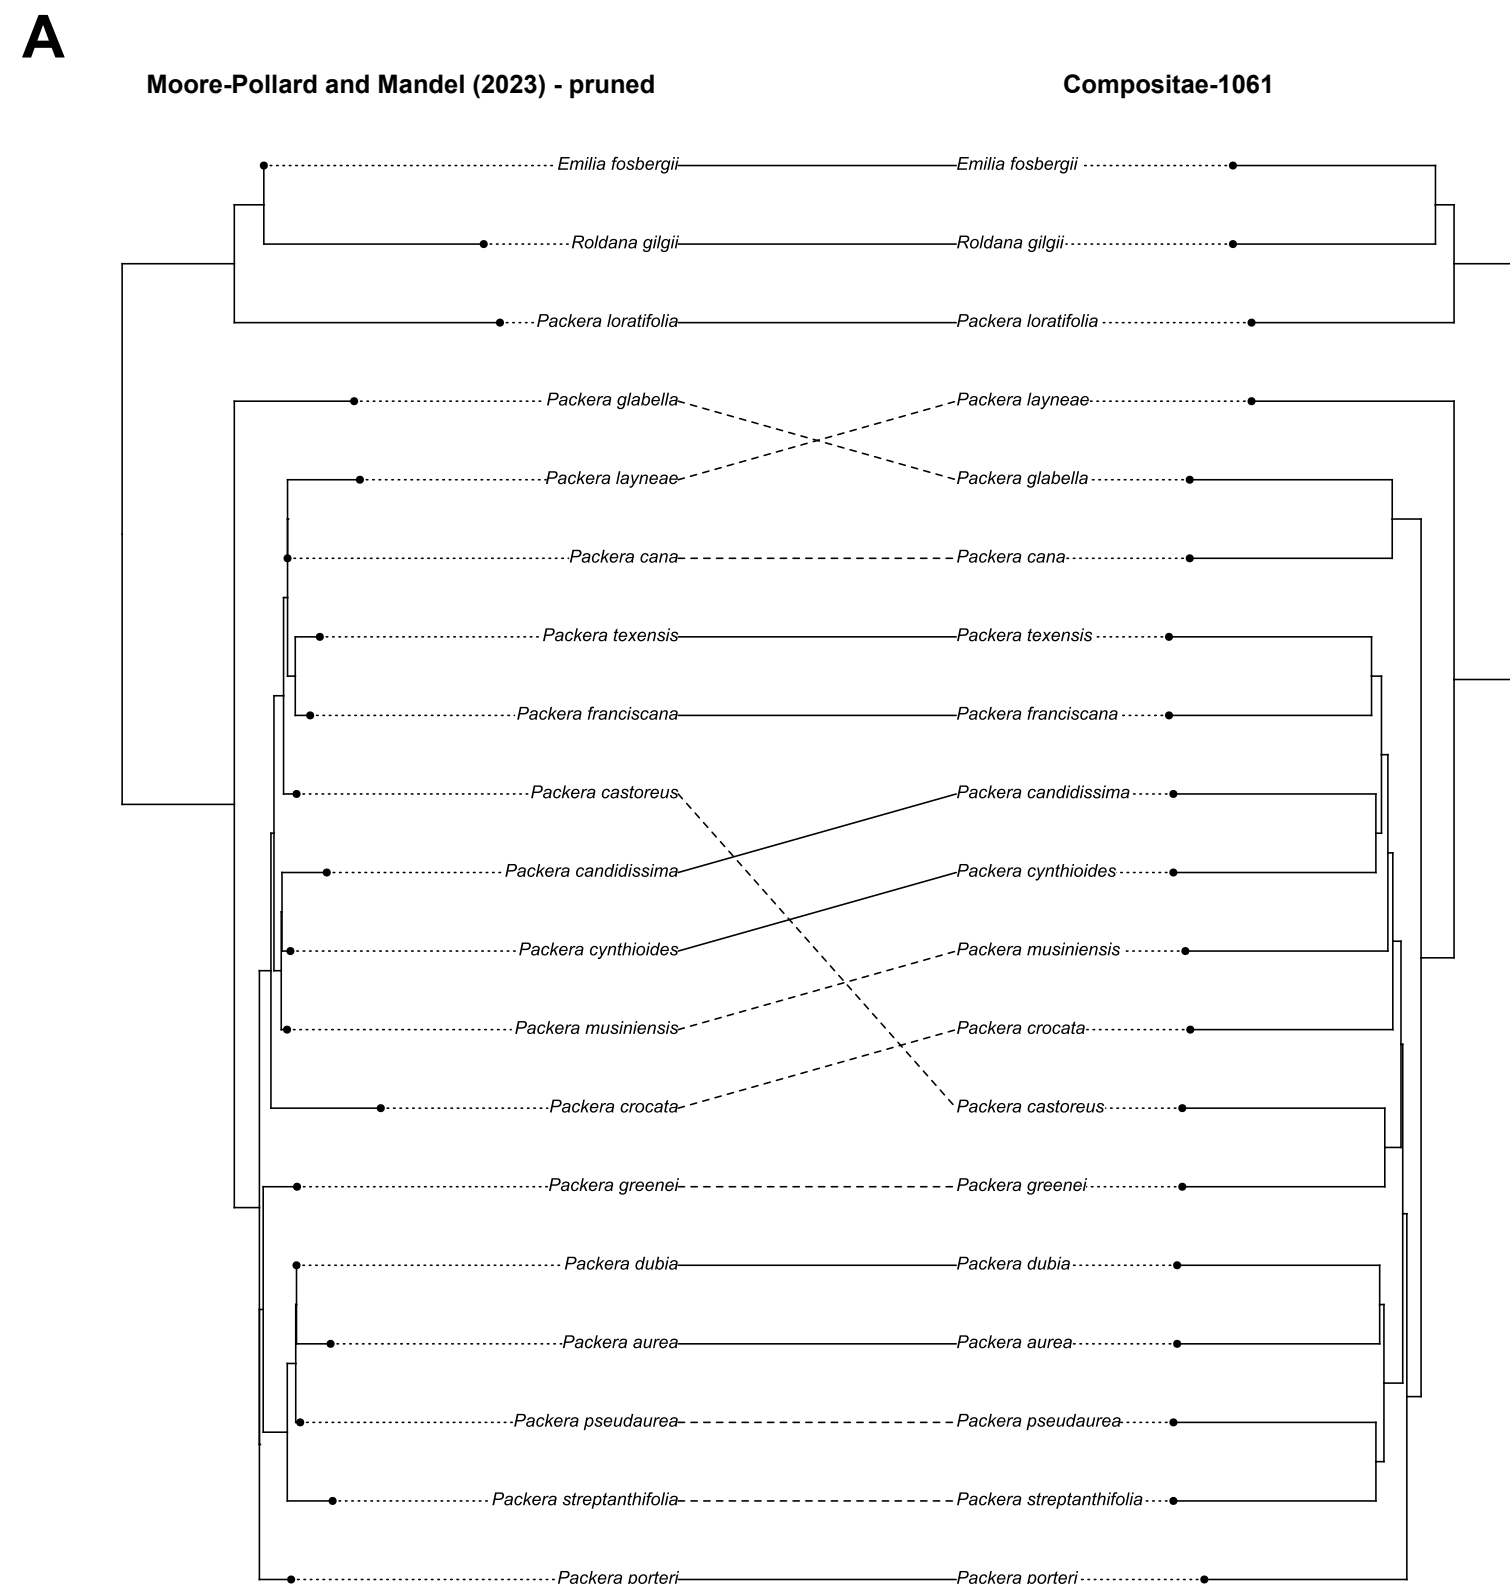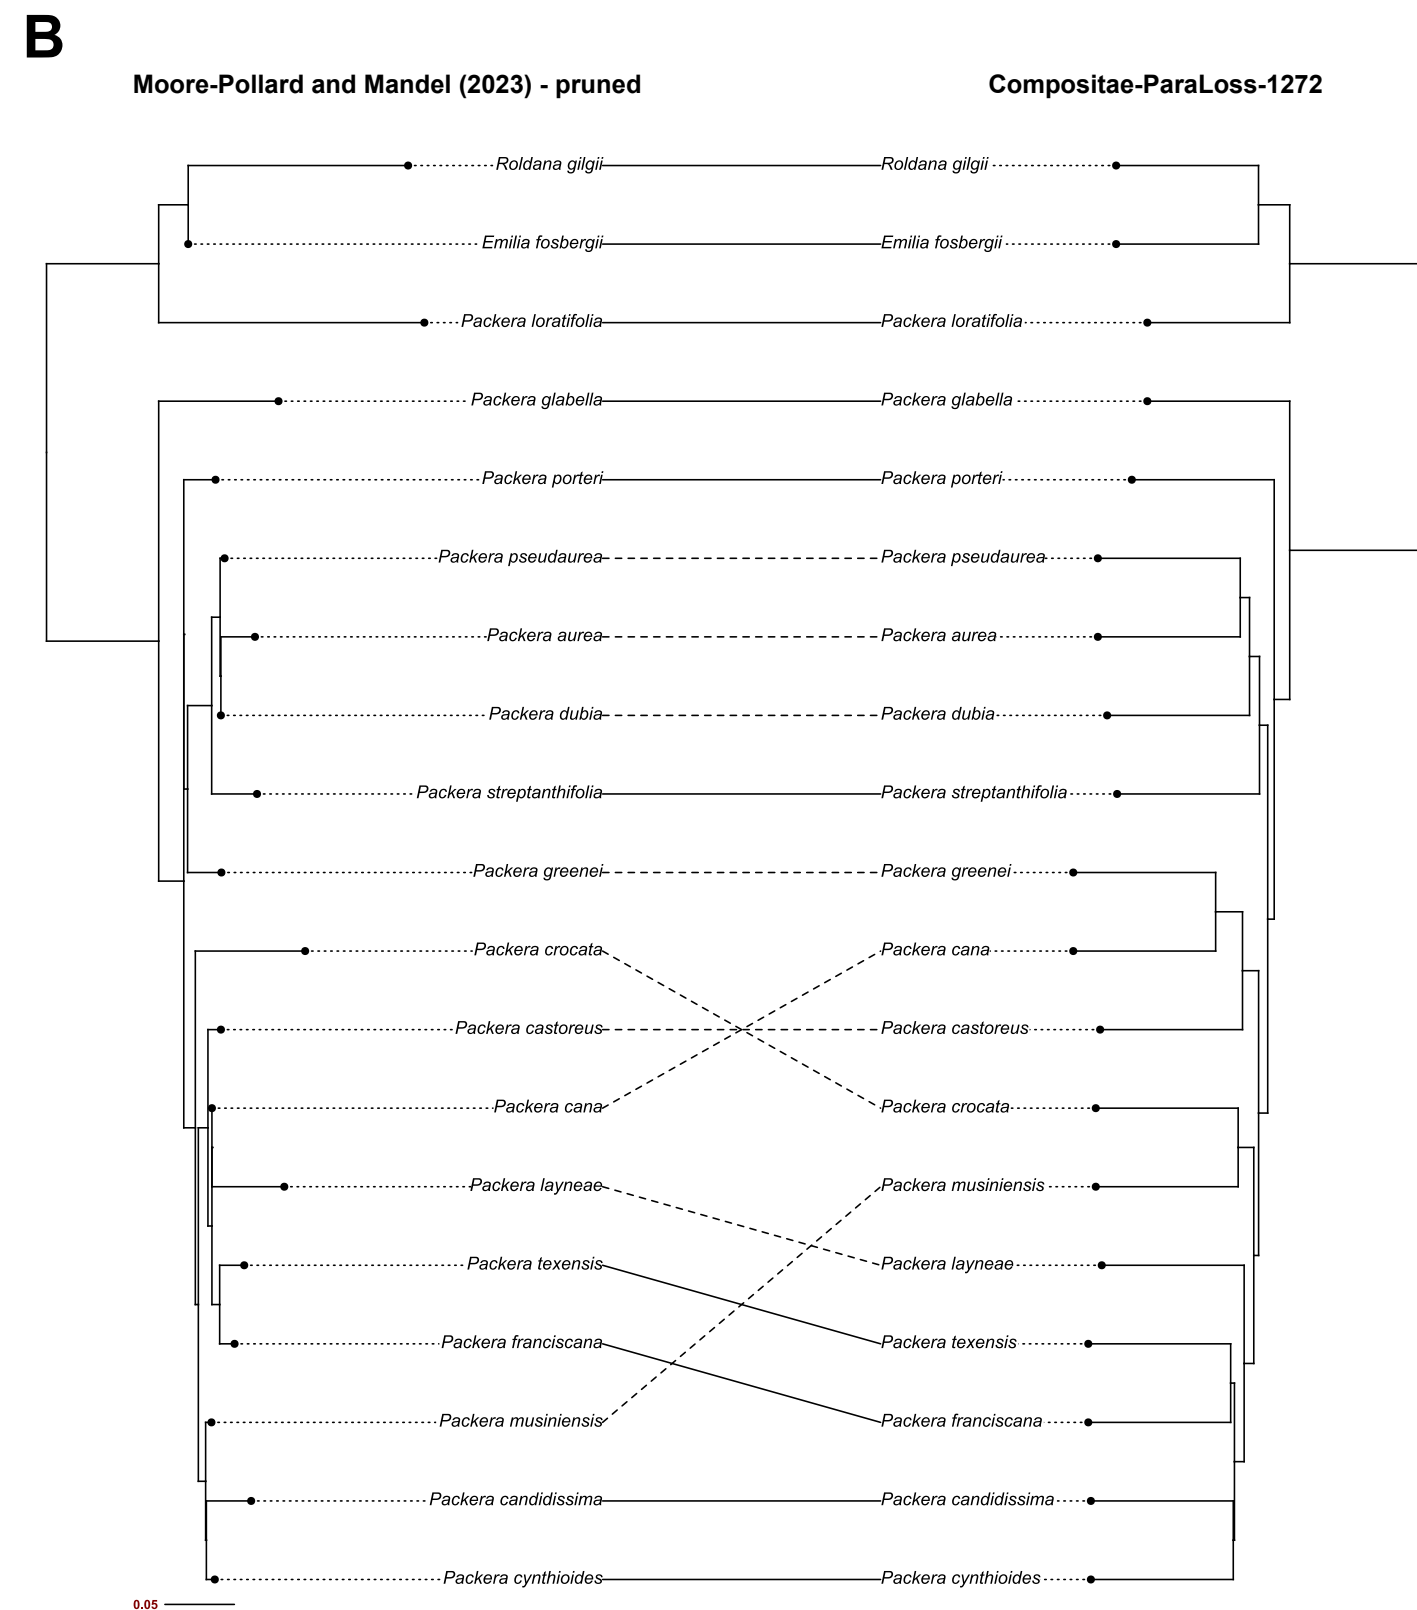

Supplement: APS3-12-e11568-s001.pdf [file APS3-12-e11568-s001.pdf]
