# Supplementary material for: Compositae‐ParaLoss‐1272: A complementary sunflower‐specific probe set reduces paralogs in phylogenomic analyses of complex systems
Source: PubMed Central journal article supplement — Appl Plant Sci. 2024 Jan 27;12(1):e11568. doi: 10.1002/aps3.11568 (PMC10873820; doi:10.1002/aps3.11568), 2024-01-27

**APPENDIX S5.** Tanglegrams comparing the relationships between the combined data set, Compositae-1061 + Compositae-ParaLoss-1272, against the individual data sets: Compositae-1061 (A) and Compositae-ParaLoss-1272 (B). Lines between the taxa at the tips compare relationships: solid lines indicate the same relationship; dashed lines indicate differing relationships. Local posterior probability (LPP) values are represented at each node, with full support (1.0 LPP) in blue, moderate support (0.9–0.99 LPP) in green, and low support ( $\leq 0.89$  LPP) in red.

**A**

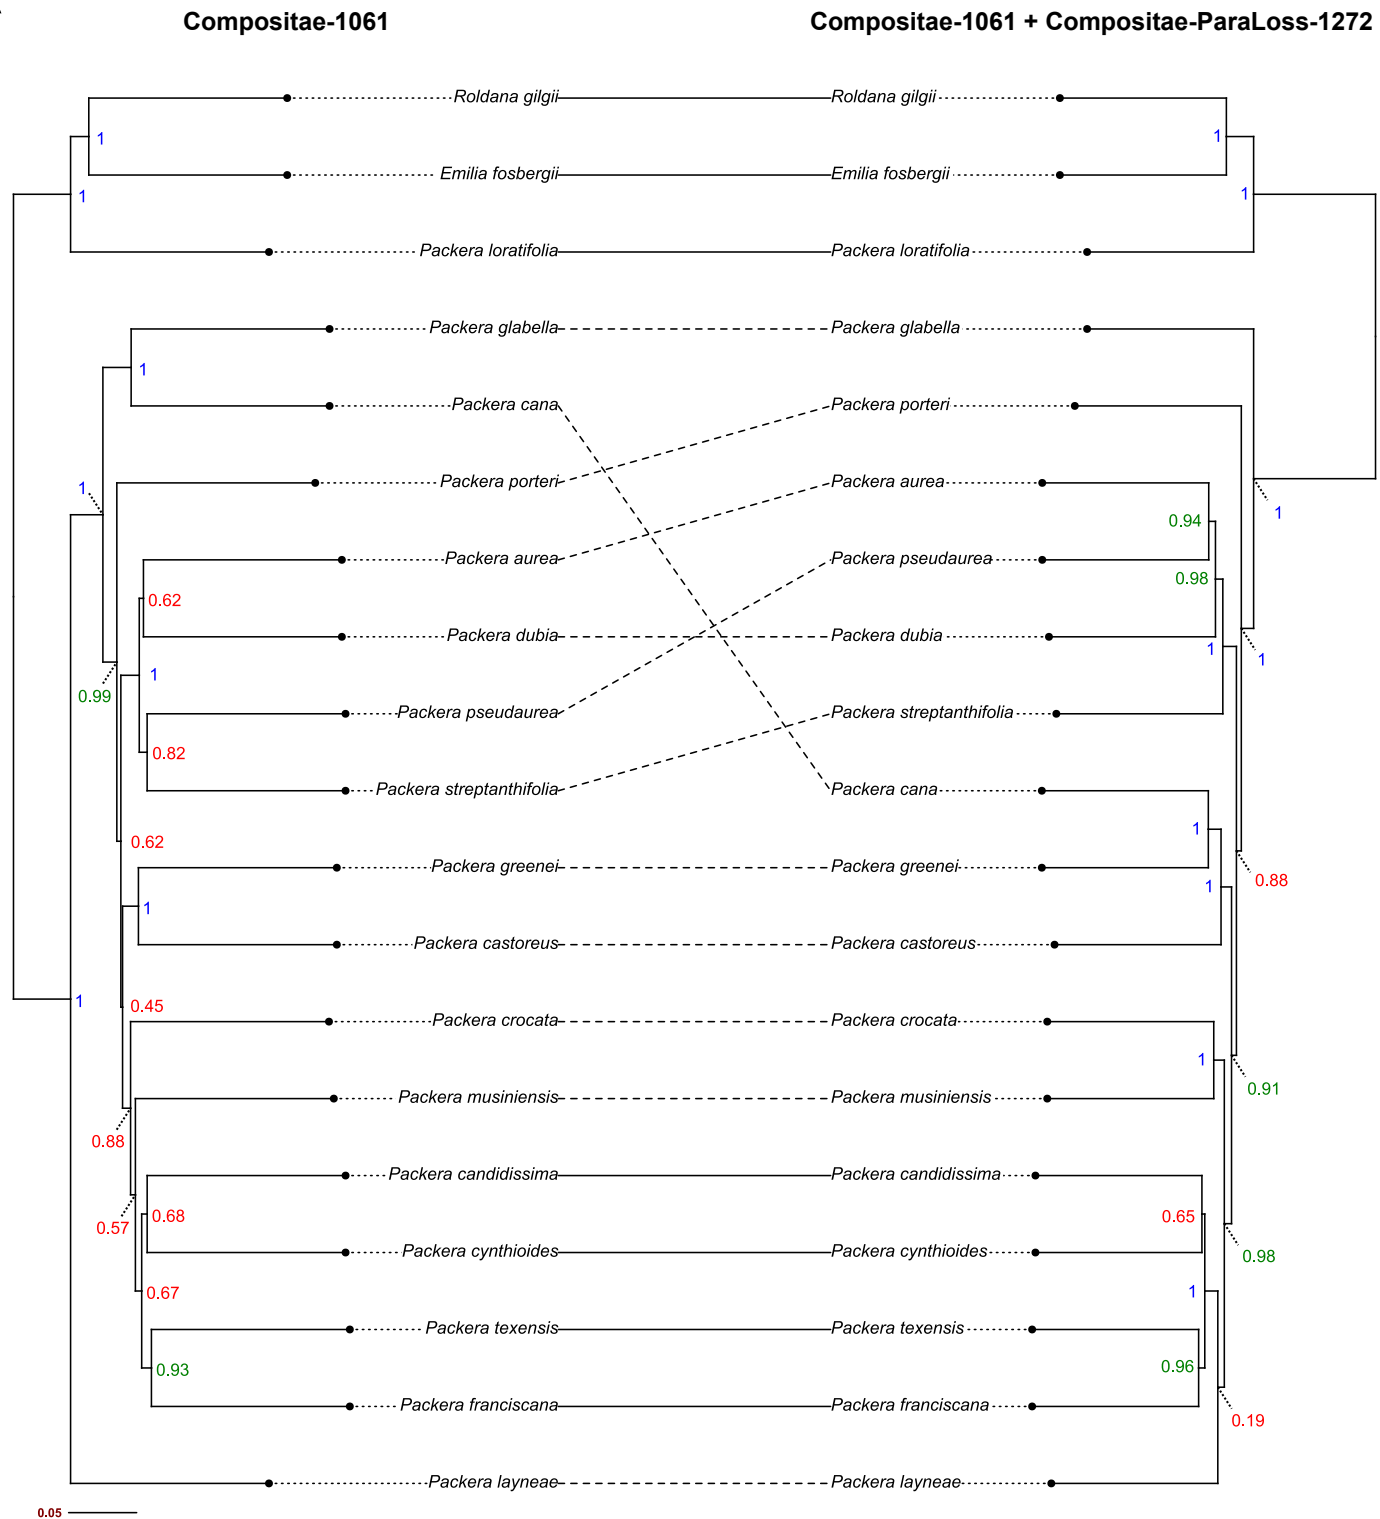

**B**

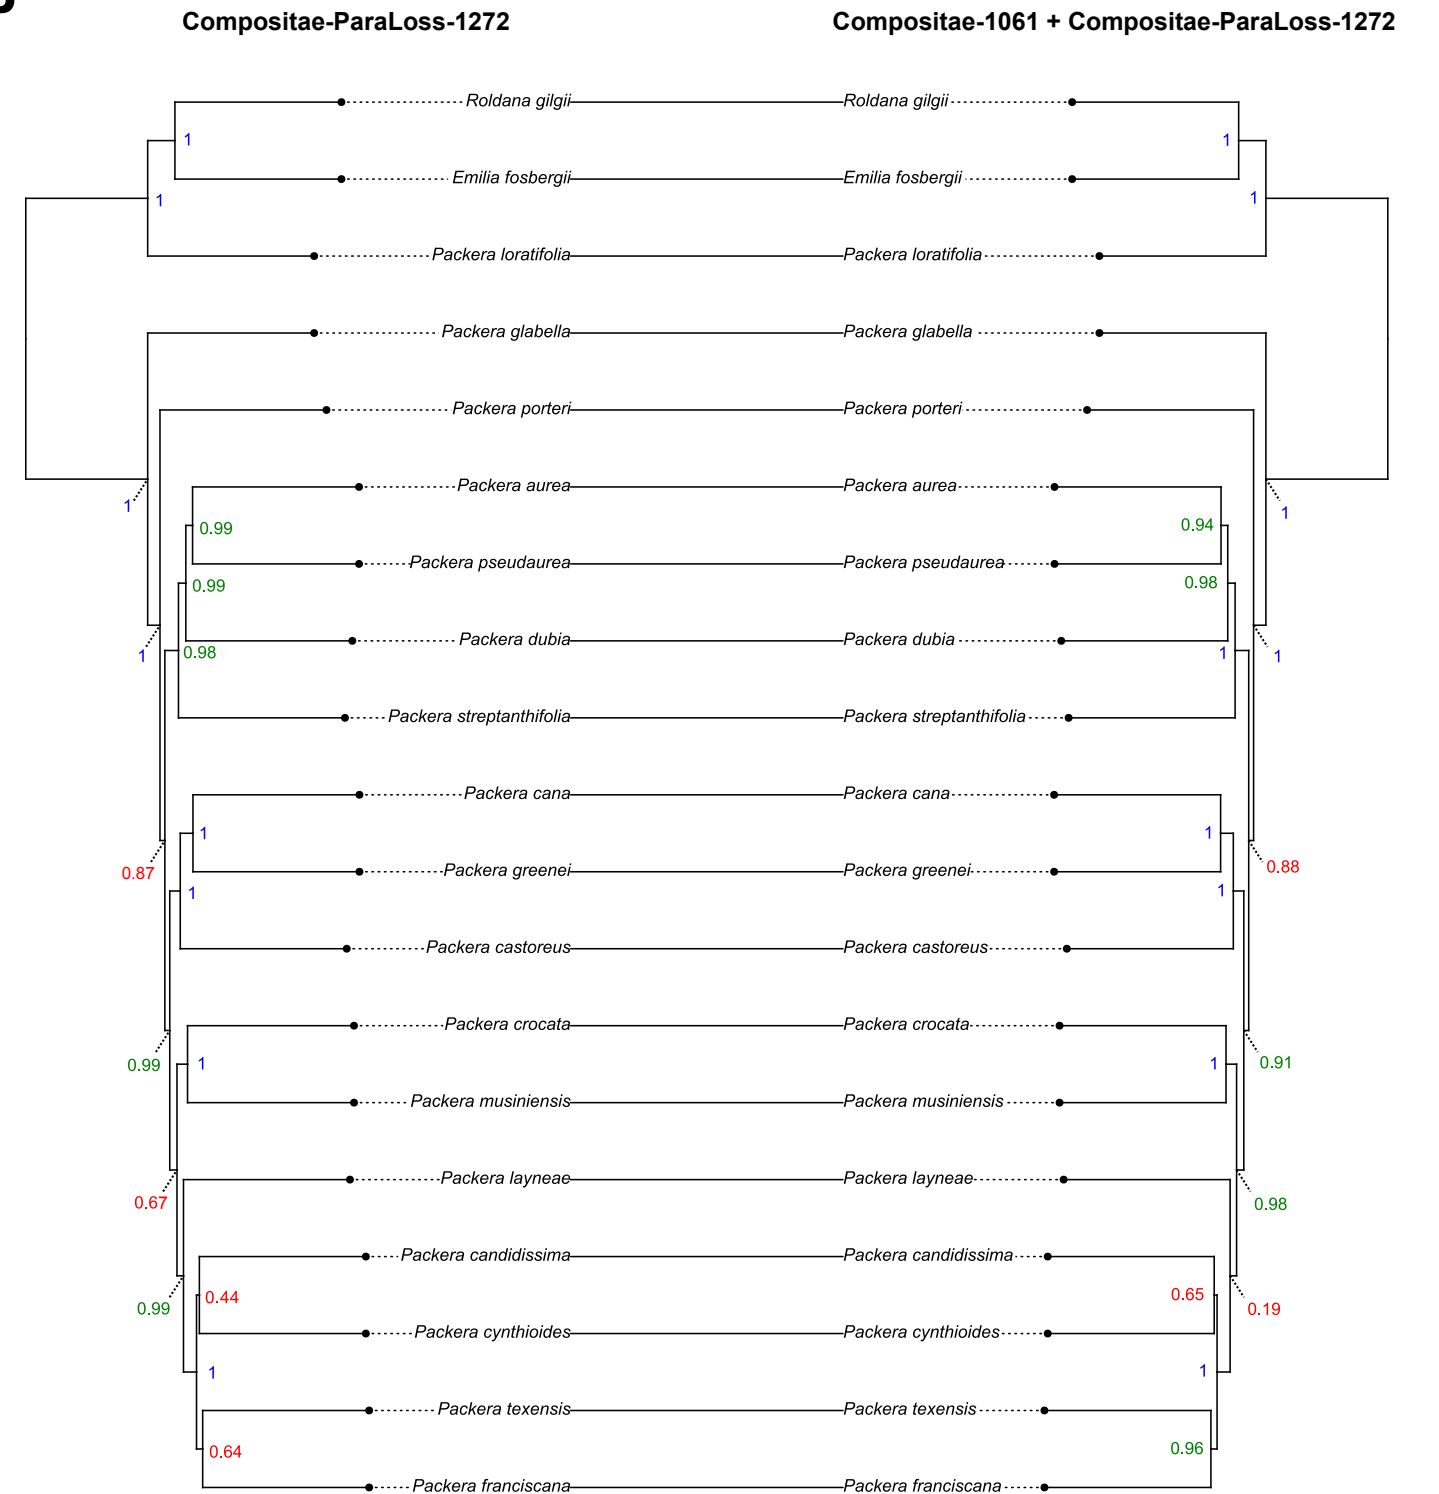

Supplement: APS3-12-e11568-s004.pdf [file APS3-12-e11568-s004.pdf]
